# Supplementary material for: PINK1-Associated Parkinson's Disease Is Caused by Neuronal Vulnerability to Calcium-Induced Cell Death
Source: PubMed Central journal article supplement (PMC2724101; doi:10.1016/j.molcel.2009.02.013), 2009-03-13

## Supplemental Data

### **PINK1-Associated Parkinson's Disease**

#### **Is Caused by Neuronal Vulnerability**

#### **to Calcium-Induced Cell Death**

**Sonia Gandhi, Alison Wood-Kaczmar, Zhi Yao, Helene Plun-Favreau, Emma Deas, Kristina Klupsch, Julian Downward, David S. Latchman, Sarah J. Tabrizi, Nicholas W. Wood, Michael R. Duchon, and Andrey Y. Abramov**

#### **Supplemental Experimental Procedures**

##### **Cell culture: human PINK1 KD cell models**

ReNcell VM (ReNcell VM) neural stem cells (NSCs) were derived from 9 week human fetal ventral mesencephalon as described. NSCs were grown in laminin coated flasks/plates (Trevigen; 20 µg/ml in DMEM:F-12) in B27 medium (DMEM:F-12 with 1X B27 supplement, 2mM Glutamine, 10 Units/ml heparin and 50 mg/ml gentamycin) containing growth factors human bFGF [10ng/ml, Peprotech] and human EGF [20ng/ml, Peprotech]. Differentiation to human neurons was performed using a standard method. SH-SY5Y human neuroblastoma cells were maintained as described (Muqit et al., 2006). Generation of stable PINK1 KD in SH-SY5Y cells and NSCs has been previously described. Briefly mammalian expression vectors expressing shRNA targeted to PINK1 mRNA sequence were packaged into retroviral particles, and used to infect SH-SY5Y cells and NSCs. Stable cell lines expressing PINK1 shRNA were screened for PINK1 expression using semi-quantitative real time PCR. 3 clones of each cell type with > 90% reduction in gene expression were selected for use in all experiments. 3 clones expressing empty vector were used as controls. For PINK1 rescue experiments, 3 silent mutations were introduced in the wild-type PINK1 sequence (pcDNA 3.1 vector) in the region targeted by the shRNA. PINK1 KD SHSY5Y cells were then transfected with wild-type PINK1-pcDNA 3.1, or K219M-PINK1-pcDNA3.1 and double stable cell lines were generated. RT-PCR confirmed re-expression of PINK1 in these cell lines.

##### **Cell culture: primary PINK1 KO mouse neuronal model**

The PINK1 deficient mice were generated by Lexicon Genetics Inc. (The Woodlands, Texas, USA). For primary mouse cortical cultures, embryos were taken at gestational stage E16-E17. For primary mouse midbrain cultures pups were taken at postnatal D4-6. Embryos/pups were obtained either by crossing homozygote animals and comparing same age control animals, or by crossing two heterozygote animals and comparing genotypes within a litter. Animal husbandry and experimental procedures were performed in full compliance with the United Kingdom

Animal (Scientific Procedures) Act of 1986. Heads were collected in chilled dissection medium [HBSS without calcium or magnesium, supplemented with 0.45% (v/v) D-(+) glucose, 1 mM sodium pyruvate and 10 mM HEPES pH 7.4]. The whole brain was removed from the skull case in a Petri dish containing chilled dissection medium under sterile conditions, and the meninges were removed. The cortices or midbrain was carefully dissected and transferred to a sterile micro tube containing ~0.5 ml chilled dissection medium and allowed to settle under gravity. Dissection medium was replaced with 500  $\mu$ l pre-warmed trypsin solution for 15 minutes at 37°C with gentle agitation halfway through incubation. The trypsin solution was aspirated and the cortices/midbrain washed three times with 500  $\mu$ l pre-warmed attachment medium [1x Modified Eagles Medium (MEM) with Earles and glutamine (Invitrogen), 1 mM pyruvic acid, 0.45% (w/v) D-(+) glucose (Sigma) and 10% (v/v) heat inactivated fetal bovine serum (Invitrogen)]. The tissue was triturated using sterile fire-polished glass pipettes of differing pore diameter until a smooth suspension was produced. Cells were placed in a humidified CO<sub>2</sub> incubator (5% CO<sub>2</sub> in air) at 37°C for 3-4 hrs, before replacing the attachment medium with prewarmed maintenance medium [Neurobasal medium (Invitrogen), 2% (v/v) B27 supplement, 2 mM glutamine, 100 I.U./ml penicillin and 100 I.U./ml streptomycin (Sigma) and 0.45% (v/v) D-(+) glucose]. Once the cells were in maintenance medium, half of the medium was replaced weekly. All live cell imaging experiments were performed between d10-d14 in culture.

### Figure S1. PINK1 deficiency causes reduced glucose uptake in neuroblastoma cells and mammalian neurons

(A) Measurement of fluorescent 2-NBDG revealed that the rate of glucose uptake in PINK1 KO cortical mouse neurons was  $41.7 \pm 3.9\%$  of WT neurons.

(B) PINK1 KD neuroblastoma cells exhibited a reduction in glucose uptake:  $63.8 \pm 5.4\%$  of control cells.

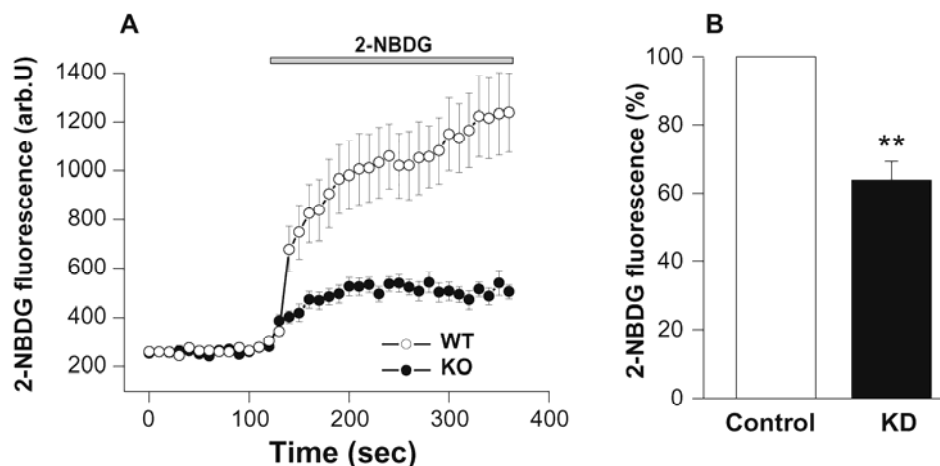

**Figure S2. PINK1 KO neurons have an increased  $[Ca^{2+}]_m$  compared to wild-type neurons**

(A) Basal mitochondrial Rhod-5N fluorescence signal is higher in PINK1 KD neurons (Aii) compared to control human neurons (Ai)

(B) Differences in response to  $5\mu\text{M}$  ionomycin in thapsigargin ( $0.5\mu\text{M}$ ) treated cells in calcium free medium ( $0.5\text{mM}$  EGTA). PINK1 KO neurons and astrocytes (Bii) showed a significantly higher change in  $[Ca^{2+}]_c$  following ionomycin treatment, than wild-type cells (Bi) reflecting a higher  $[Ca^{2+}]_m$  in PINK1 KO neurons.

(C) Histogram demonstrating %age difference in  $[Ca^{2+}]_m$  between PINK1 KO mouse neurons and astrocytes and controls.

(D) demonstrates a similar increase in  $[Ca^{2+}]_m$  for human PINK1 KD neurons compared to control neurons.

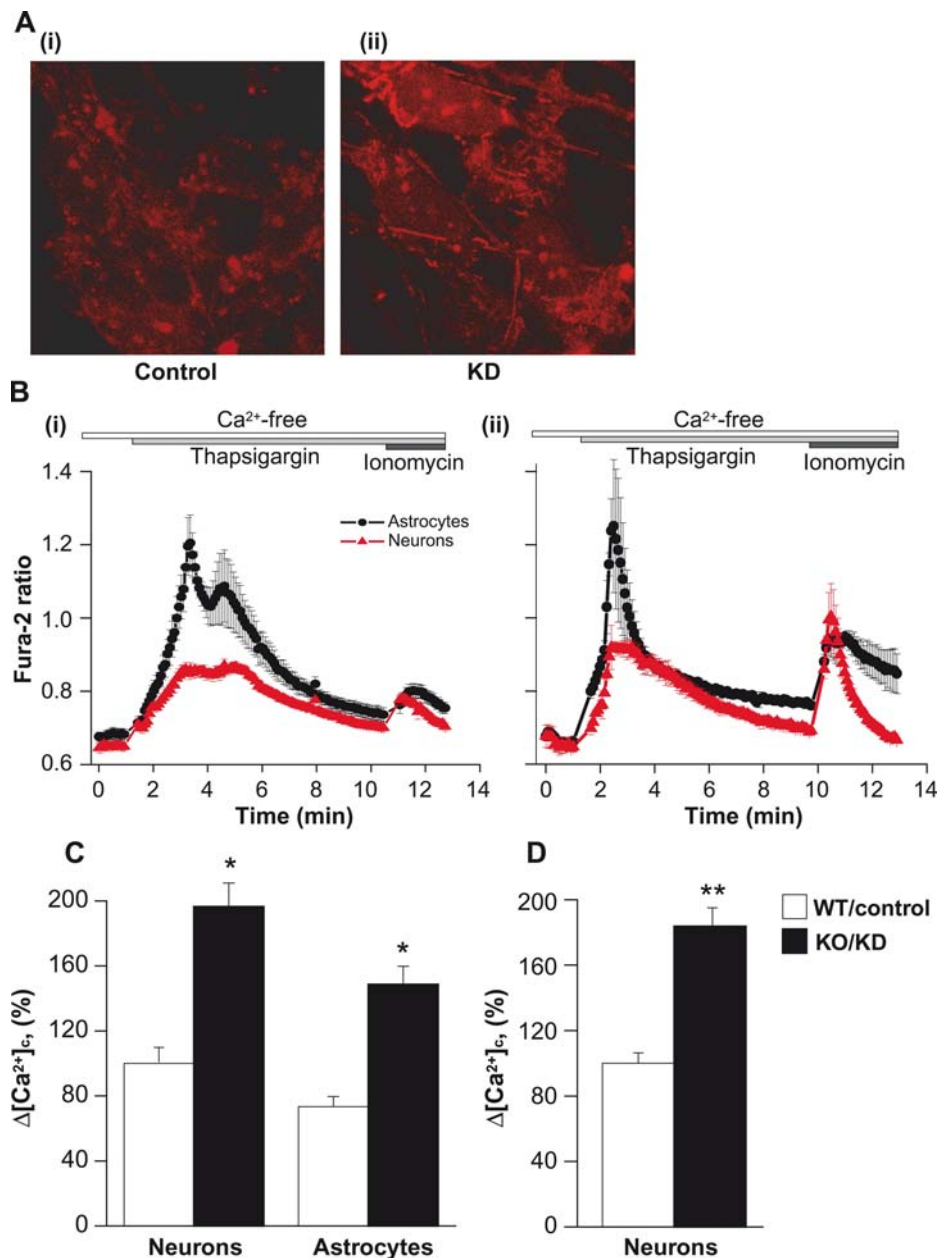

Supplement: mmc1.pdf [file mmc1.pdf]
